# Supplementary material for: DNA Damage-Inducible Pyocin Expression Is Independent of RecA in xerC-Deleted Pseudomonas aeruginosa
Source: PubMed Central journal article supplement (PMC9431673; doi:10.1128/spectrum.01167-22), 2022-06-16
Supplement: spectrum.01167-22-s0001.pdf [file spectrum.01167-22-s0001.pdf]

Table S1. *Escherichia coli* strains used in this work.

| Strain  | Genotype or description                               | Source or reference |
|---------|-------------------------------------------------------|---------------------|
| MTC2179 | SM10 pEXG2- $\Delta recA$ , Gent <sup>R</sup>         | (1)                 |
| MTC2286 | SM10 pCTX-1-P <sub>07990</sub> -gfp, Tet <sup>R</sup> | (1)                 |
| MTC2287 | SM10 pCTX-1-P <sub>07990</sub> -lux, Tet <sup>R</sup> | (1)                 |

### Modes of strain construction

*P. aeruginosa* strains

#### MTC2441

MTC2327 (PA14 *xerC*<sub>Y272F</sub>) (1) was mated with MTC2179: 1.2 ml of an overnight LB culture of MTC2179 was mixed with 350  $\mu$ l of an overnight LB culture of MTC2327, centrifuged for 2 min at 10,000 g, the supernatant was discarded, and the concentrated cell suspension was spotted on an LB-1.5% agar plate and dried. The plate was incubated at 30°C overnight, and the resulting colony was scraped up with a sterile loop and resuspended in 500  $\mu$ l sterile phosphate-buffered saline (PBS) or LB. An aliquot (typically 100  $\mu$ l) of the suspension was spread on VBMM agar containing 75  $\mu$ g/ml gentamycin and grown overnight at 37°C to select for *P. aeruginosa* transconjugants with integrated pEXG2- $\Delta recA$ , and several of the resulting colonies were streaked onto no-salt LB with 15% sucrose to select second crossovers (2). A number of the sucrose-resistant colonies arising were then patched on LB and LB with 20  $\mu$ g/mL gentamycin. At least 2 sucrose-resistant, gent-sensitive clones were then streaked for single colonies, checked by PCR for presence of the desired deletion, and frozen at -80°C in 25% glycerol.

#### MTC2444

MTC2441 was mated with MTC2287 as described above for MTC2441, and a 10- $\mu$ l aliquot of the resuspended mating colony was spread on LB plates with 75  $\mu$ g/mL tetracycline and 25  $\mu$ g/mL irgasan to select for *P. aeruginosa* transformants. At least 2 colonies were then re-streaked for single colonies on LB-tet (25  $\mu$ g/mL), grown in LB overnight at 37°C, and stored in 25% glycerol at -80°C.

#### MTC2448

Made as for MTC2444, except MTC 2274 (PA14  $\Delta recA$ ) (1) was mated with MTC2286.

#### MTC2303

Made as for MTC2444, except MTC 2276 (PA14  $\Delta prtN$ ) (1) was mated with MTC2287.

## References

1. Baggett NS, Bronson AS, Cabeen MT. 2021. SOS-Independent Pyocin Production in *P. aeruginosa* Is Induced by XerC Recombinase Deficiency. *mBio* 12:e0289321.
2. Hmelo LR, Borlee BR, Almblad H, Love ME, Randall TE, Tseng BS, Lin C, Irie Y, Storek KM, Yang JJ, Siehnel RJ, Howell PL, Singh PK, Tolker-Nielsen T, Parsek MR, Schweizer HP, Harrison JJ. 2015. Precision-engineering the *Pseudomonas aeruginosa* genome with two-step allelic exchange. *Nat Protoc* 10:1820-41.
